# Supplementary material for: Non-doped deep blue light-emitting electrochemical cells from charged organic small molecules
Source: Royal Society of Chemistry journal article supplement (doi:10.1039/c6ra02156e), 2016-01-01
Supplement: c6ra02156e1.pdf [file c6ra02156e1.pdf]

**Electronic Supplementary Information (ESI)**

**Non-doped deep blue light-emitting electrochemical cells from charged  
organic small molecules**

Kanagaraj Shanmugasundaram,<sup>a</sup> Madayanad Suresh Subeesh,<sup>a</sup> Chozhidakath Damodharan

Sunesh,<sup>a</sup> and Youngson Choe\*<sup>a</sup>

<sup>a</sup>School of Chemical and Biomolecular Engineering, Pusan National University, Busan 609-735,  
Republic of Korea

\* Corresponding author: Prof. Youngson Choe

Email: [choe@pusan.ac.kr](mailto:choe@pusan.ac.kr)

Tel.: +8251 510 2396;

Fax: +8251 512 8634.

**Table of contents**

|                                 |    |
|---------------------------------|----|
| Thin film emission spectra..... | S3 |
| DSC of compound 1.....          | S3 |
| DSC of compound 2.....          | S4 |

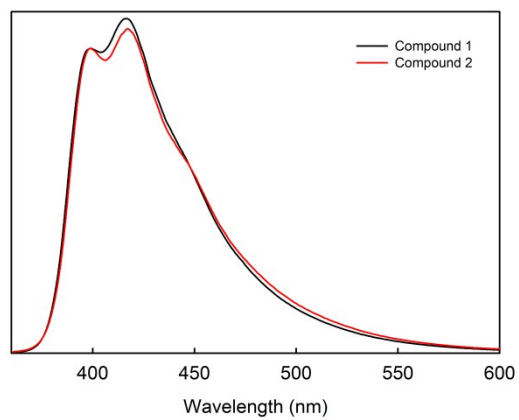

**Fig. S1** Thin film emission spectra.

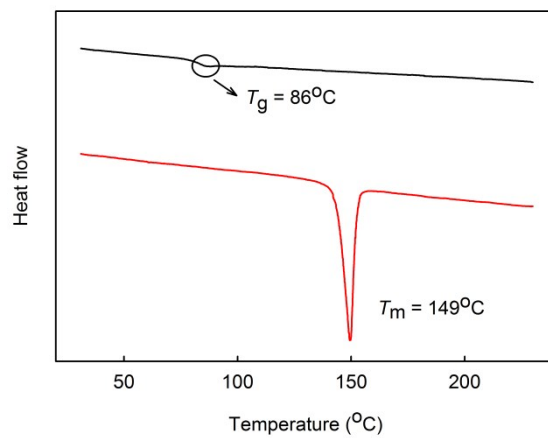

**Fig. S2** DSC curves of compound 1.

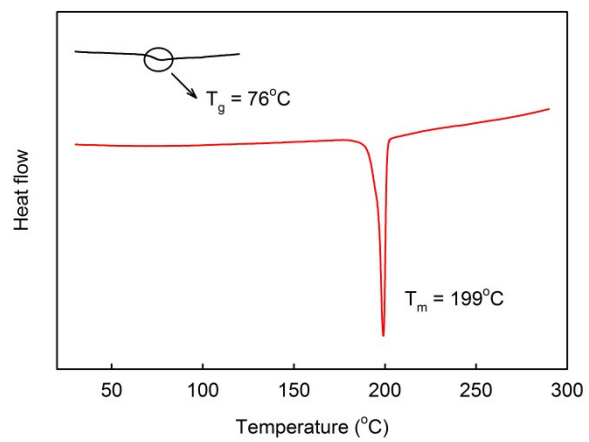

**Fig. S3** DSC curves of compound 2.
